# Supplementary material for: Graphene-sandwiched nitrogen-enriched π-conjugated molecules as redox-active cathodes for Li-ion batteries
Source: Royal Society of Chemistry journal article supplement (doi:10.1039/d3ma00291h), 2023-01-01
Supplement: d3ma00291h1.pdf [file d3ma00291h1.pdf]

*Supplementary Information for*

**Graphene-sandwiched nitrogen-enriched  $\pi$ -conjugated molecules as redox-active cathodes for Li-ion batteries**

**Kai Chen, Xiaolan Ma, Xiaoyan Han\*, and Yingkui Yang\***

*Key Laboratory of Catalysis and Energy Materials Chemistry of Ministry of Education & Hubei Key Laboratory of Catalysis and Materials Science, South-Central Minzu University, Wuhan 430074, China*

*E-mail: [xyhan@scuec.edu.cn](mailto:xyhan@scuec.edu.cn) (X. Han)*

*E-mail: [ykyang@wtu.edu.cn](mailto:ykyang@wtu.edu.cn) (Y. Yang)*

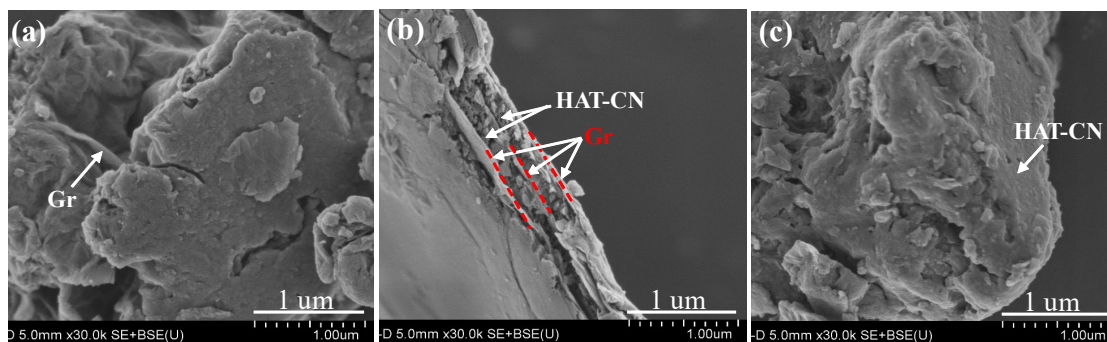

Figure S1 SEM images of HAT-CN@Gr-1 (a), HAT-CN@Gr-2 (b) and HAT-CN@Gr-3 (c) composites.

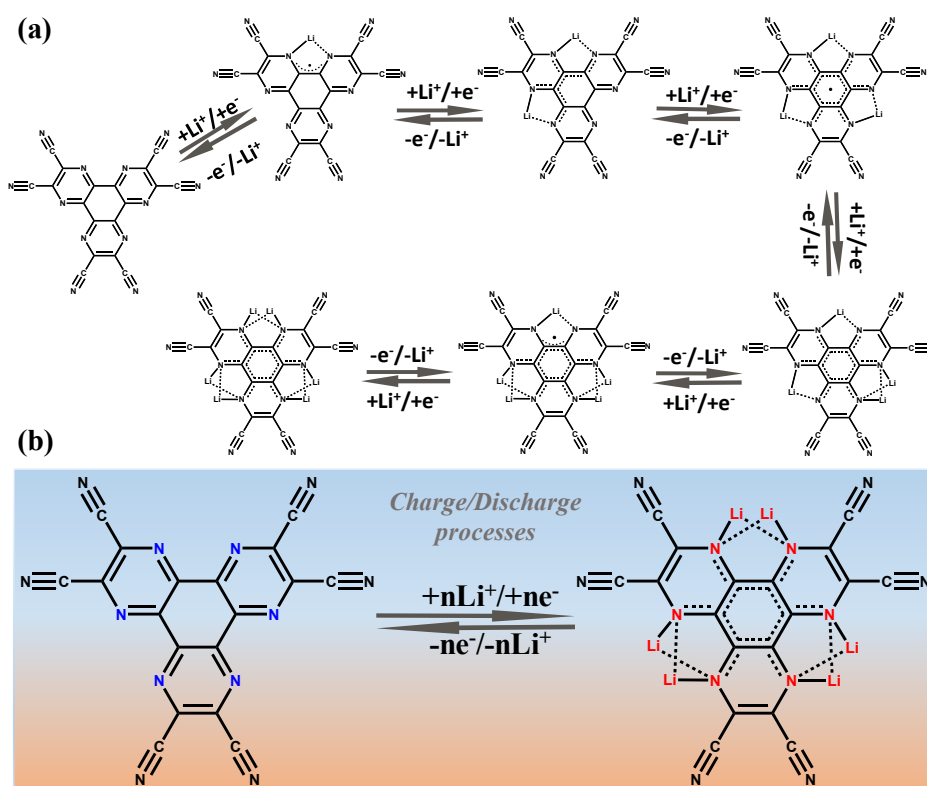

Figure S2 The mechanism of Li-ions insertion/extraction into/from HAT-CN unit (a) and the proposed electrochemical redox mechanism of HAT-CN cathode (b).

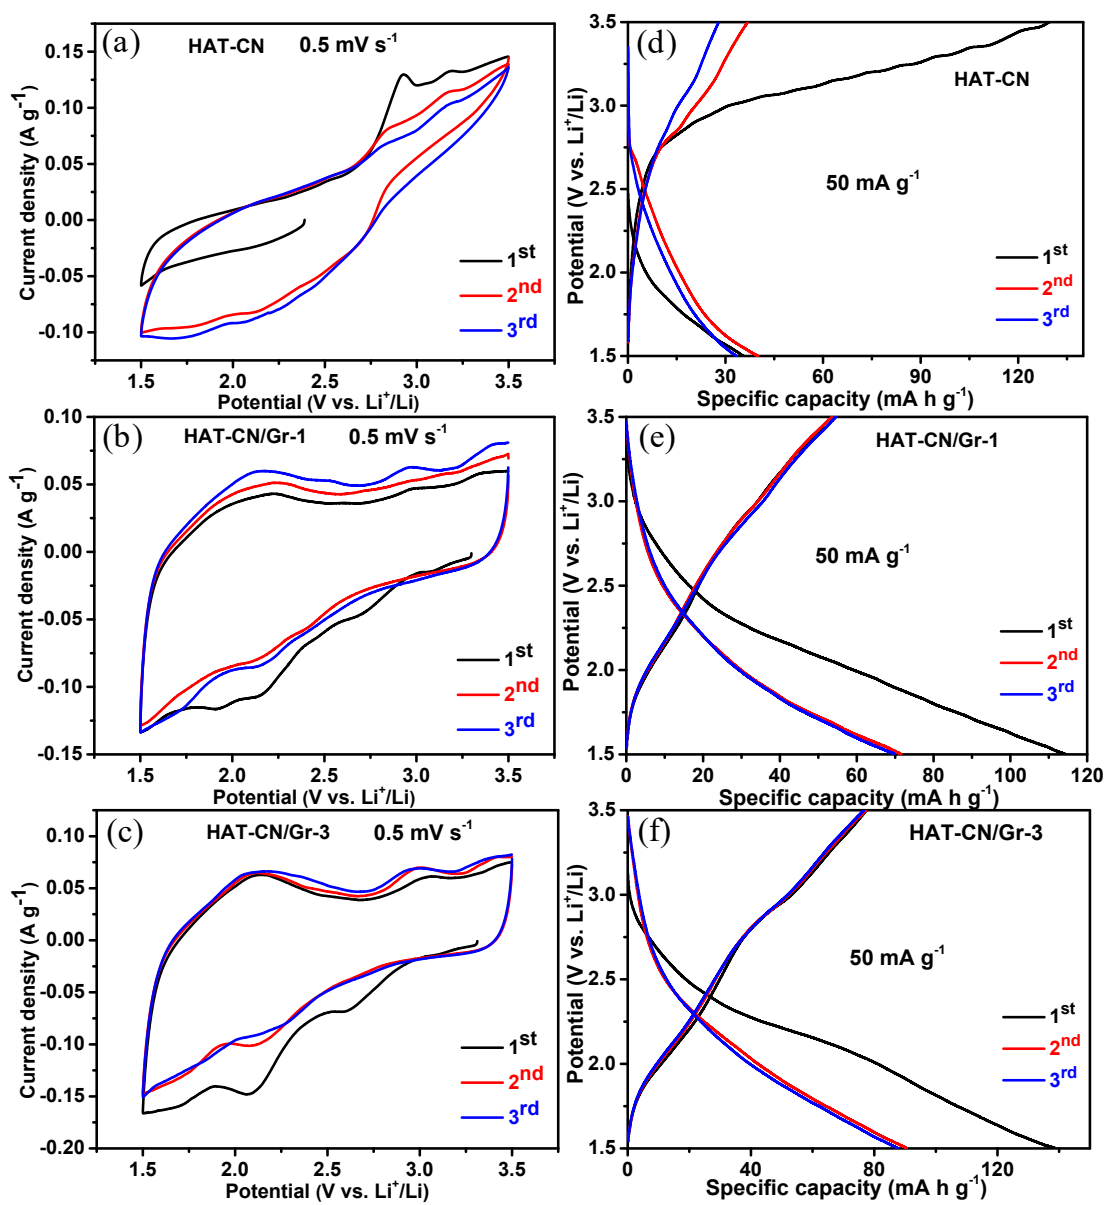

Figure S3 Typical CV curves and charge/discharge voltage profiles of HAT-CN and HAT-CN@Gr composites in the first three cycles.

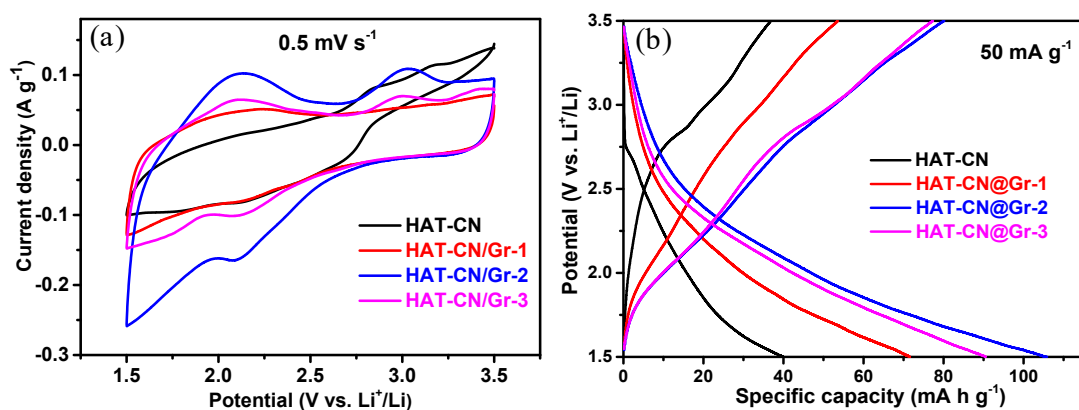

Figure S4 (a) CV curves and (b) charge/discharge voltage profiles of HAT-CN and HAT-CN@Gr for the 2<sup>nd</sup> cycle.

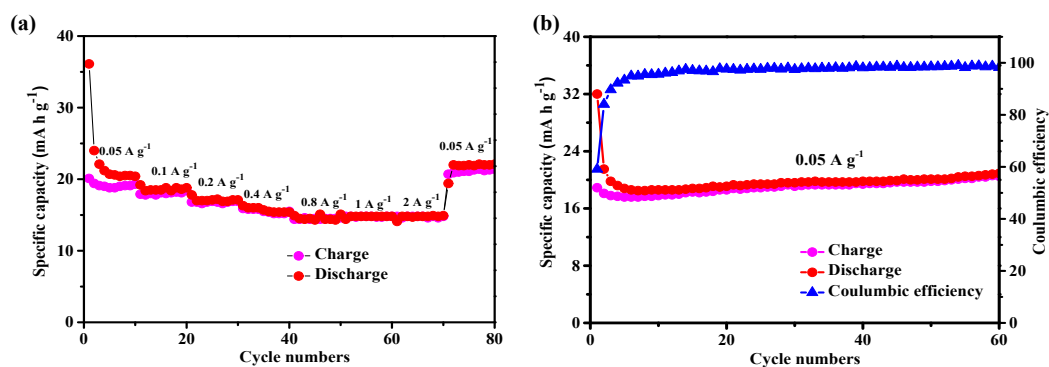

Figure S5 Rate performance (a) and cycling stability (b) for the Gr cathodes.

**Table S1** Elemental contents of HAT-CN and HAT-CN/Gr composites obtained from elemental analysis.

| Sample     | N<br>[wt%] | C<br>[wt%] | H<br>[wt%] |
|------------|------------|------------|------------|
| HAT-CN     | 42.36      | 55.12      | 0.352      |
| HAT-CN/G-3 | 13.99      | 57.7       | 3.185      |
| HAT-CN/G-2 | 17.64      | 56.6       | 3.125      |
| HAT-CN/G-1 | 21.85      | 56.31      | 3.051      |
